# Supplementary material for: WRKY Transcription Factors in Nicotiana tabacum Modulate Plant Immunity against Whitefly via Interacting with MAPK Cascade Pathways
Source: PubMed Central journal article supplement (PMC7824566; doi:10.3390/insects12010016), 2020-12-29
Supplement: insects-12-00016-s001.pdf [file insects-12-00016-s001.pdf]

**Table S1.** Primers used in this paper.

| gene     | Primer name   | Primer sequence                   | Primer application        |
|----------|---------------|-----------------------------------|---------------------------|
| NtWRKY4  | WRKY4-qPCR-F  | CACTGAAAGATCGACGAGGA              | qRT-PCR                   |
|          | WRKY4-qPCR-R  | TTGGCATTGAGAATGTGCTT              | qRT-PCR                   |
| NtWRKY6  | WRKY6-qPCR-F  | CAAGAAACCTCTTGCAACCA              | qRT-PCR                   |
|          | WRKY6-qPCR-R  | TTAACTTCGGCGGTATCCTC              | qRT-PCR                   |
| NtWRKY10 | WRKY10-qPCR-F | GTCCGTTGTTTCTGACCCCTT             | qRT-PCR                   |
|          | WRKY10-qPCR-R | CCGTCCTGGTAACTTCTGCT              | qRT-PCR                   |
| NtWIPK   | WIPK-qPCR-F   | AACTCACGGCGGACAATA                | qRT-PCR                   |
|          | WIPK-qPCR-R   | CCATAAGCACCACGACCA                | qRT-PCR                   |
| NtSIPK   | SIPK-qPCR-F   | CCGGTGGCCGGTATGGATAA              | qRT-PCR                   |
|          | SIPK-qPCR-R   | CAAACGATGCCGTAAGCACCT             | qRT-PCR                   |
| NtNTF4   | NTF4-qPCR-F   | CCGGTGGCCGGAATCGATAA              | qRT-PCR                   |
|          | NTF4-qPCR-R   | CGATGGGCATAATCGGTGGCT             | qRT-PCR                   |
| NtNRK1   | NRK1-qPCR-F   | ACATCCCTCCTATTCAACCTGTGC          | qRT-PCR                   |
|          | NRK1-qPCR-R   | ACCTCCTCCTTCGTCTCCGA              | qRT-PCR                   |
| NtGAPDH  | GAPDH-qPCR-F  | GCAGTGAACGACCCATTATCTC            | qRT-PCR                   |
|          | GAPDH-qPCR-R  | AACCTTCTTGGCACCACCT               | qRT-PCR                   |
| NtWRKY4  | siWRKY4-F     | CGCGGATCCAACCATTAACGAAACCTC       | VIGS                      |
|          | siWRKY4-R     | TGCTCTAGACACCTATTCTGAACCACAT      | VIGS                      |
| NtWRKY6  | siWRKY6-F     | CGCGGATCCTCCACTTATCCAAGGCACT      | VIGS                      |
|          | siWRKY6-R     | TGCTCTAGACGGAGGCTTCAAATACTG       | VIGS                      |
| NtWRKY10 | siWRKY10-F    | CGCGGATCCGCAGCGAGAAGAAGGAAG       | VIGS                      |
|          | siWRKY10-R    | TGCTCTAGAGCCCACAGCGATAGGTTA       | VIGS                      |
| NtWIPK   | siWIPK-F      | CGCGGATCCCTTCATAGAGATCTCAAACC     | VIGS                      |
|          | siWIPK-R      | TGCTCTAGATTCTGTTGGGGTGCCAAGAA     | VIGS                      |
| NtSIPK   | siSIPK-F      | CGCGGATCCTTGATTGGTACTCCTTCAGA     | VIGS                      |
|          | siSIPK-R      | TGCTCTAGACATCTGTTCCCTCCGTAAGGG    | VIGS                      |
| NtNTF4   | siNTF4-F      | CGCGGATCCTCTGCTTATGGAGTTGATTG     | VIGS                      |
|          | siNTF4-R      | TGCTCTAGAGTAAGGGCATGCTGTTCAAA     | VIGS                      |
| NtNRK1   | siNRK1-F      | CGCGGATCCTTAATGGATACTGATCTGCA     | VIGS                      |
|          | siNRK1-R      | TGCTCTAGAAATTGCTGCAGTATATTCAG     | VIGS                      |
| NtWRKY4  | OeWRKY4-F     | CGAGCTCATGGAGCCTGAAAATTACAC       | Transgenic overexpression |
|          | OeWRKY4-R     | GCTGCAGTAAAATTCAAAAGATAAATC       | Transgenic overexpression |
| NtWRKY6  | OeWRKY6-F     | CGAGCTCATGGAGTCTCCGTTGCCGGAA      | Transgenic overexpression |
|          | OeWRKY6-R     | GCTGCAGTCAAGAATTGTACCCTTCAAA      | Transgenic overexpression |
| NtWRKY10 | OeWRKY10-F    | GGGATCCATGTACACCATGCGAATTCAG      | Transgenic overexpression |
|          | OeWRKY10-R    | GCTGCAGTCAGAACTGCGAAGGACCTTG      | Transgenic overexpression |
| NtWRKY4  | WRKY4-nYFP-F  | CCCTTAATTAACATGGAGCCTGAAAATTACAC  | BiFC                      |
|          | WRKY4-nYFP-R  | GGGACTAGTAAATTCAAAAGATAAATC       | BiFC                      |
| NtWRKY6  | WRKY6-nYFP-F  | CCCTTAATTAACATGGAGTCTCCGTTGCCGGAA | BiFC                      |
|          | WRKY6-nYFP-R  | GGGACTAGTAGAATTGTACCCTTCAAA       | BiFC                      |
| NtWRKY10 | WRKY10-nYFP-F | CCCTTAATTAACATGTACACCATGCGAATTCAG | BiFC                      |
|          | WRKY10-nYFP-R | GGGACTAGTGAAGTGCAGGACCTTG         | BiFC                      |
| NtWIPK   | WIPK-cYFP-F   | CCCTTAATTAACATGGCTGATGCAAATATGGG  | BiFC                      |
|          | WIPK-cYFP-R   | GGGACTAGTAGCATATTCAGGATTCAGTGA    | BiFC                      |
| NtSIPK   | SIPK-cYFP-F   | CCCTTAATTAACATGGATGGTTCTGGTCAGCA  | BiFC                      |
|          | SIPK-cYFP-R   | GGGACTAGTCATATGCTGGTATTCAGGAT     | BiFC                      |

|          |              |                                  |                           |
|----------|--------------|----------------------------------|---------------------------|
| NtNTF4   | NTF4-cYFP-F  | CCCTTAATTAACATGGATGGTCCAGCTCATCA | BiFC                      |
|          | NTF4-cYFP-R  | GGGACTAGTCATGTGCTGGTATTACAGGAT   | BiFC                      |
| NtNRK1   | NRK1-cYFP-F  | CCCTTAATTAACATGGAAAACGAAACCAATGA | BiFC                      |
|          | NRK1-cYFP-R  | GGGACTAGTCTTCATTGTATTAGGATCAA    | BiFC                      |
| NtWRKY4  | WRKY4-MBP-F  | TTGCGGCCGCATGGAGCCTGAAAATTACAC   | prokaryotic<br>expression |
|          | WRKY4-MBP-R  | CGGGATCCTTAAAATTCAAAAGATAAATC    | prokaryotic<br>expression |
| NtWRKY6  | WRKY6-MBP-F  | TTGCGGCCGCATGGAGTCTCCGTTGCCGGAA  | prokaryotic<br>expression |
|          | WRKY6-MBP-R  | CGGGATCCTCAAGAATTGTACCCTTCAAA    | prokaryotic<br>expression |
| NtWRKY10 | WRKY10-MBP-F | TTGCGGCCGCATGTACACCATGCGAATTCAG  | prokaryotic<br>expression |
|          | WRKY10-MBP-R | CGGGATCCTCAGAACTGCGAAGGACCTTG    | prokaryotic<br>expression |
| NtWIPK   | WIPK-GST-F   | CGGGATCCATGGCTGATGCAAATATGGG     | prokaryotic<br>expression |
|          | WIPK-GST-F   | CCCCCGGGTTAAGCATATTCAGGATTCA     | prokaryotic<br>expression |
| NtSIPK   | SIPK-GST-F   | CGGGATCCATGGATGGTTCTGGTCAGCA     | prokaryotic<br>expression |
|          | SIPK-GST-F   | CCCCCGGGTCACATATGCTGGTATTACAG    | prokaryotic<br>expression |
| NtNTF4   | NTF4-GST-F   | CGGGATCCATGGATGGTCCAGCTCATCA     | prokaryotic<br>expression |
|          | NTF4-GST-F   | CCCCCGGGTCACATGTGCTGGTATTACAG    | prokaryotic<br>expression |
| NtNRK1   | NRK-GST-F    | CGGGATCCATGGAAAACGAAACCAATGA     | prokaryotic<br>expression |
|          | NRK-GST-R    | CCCCCGGGTCACTTCATTGTATTAGGAT     | prokaryotic<br>expression |

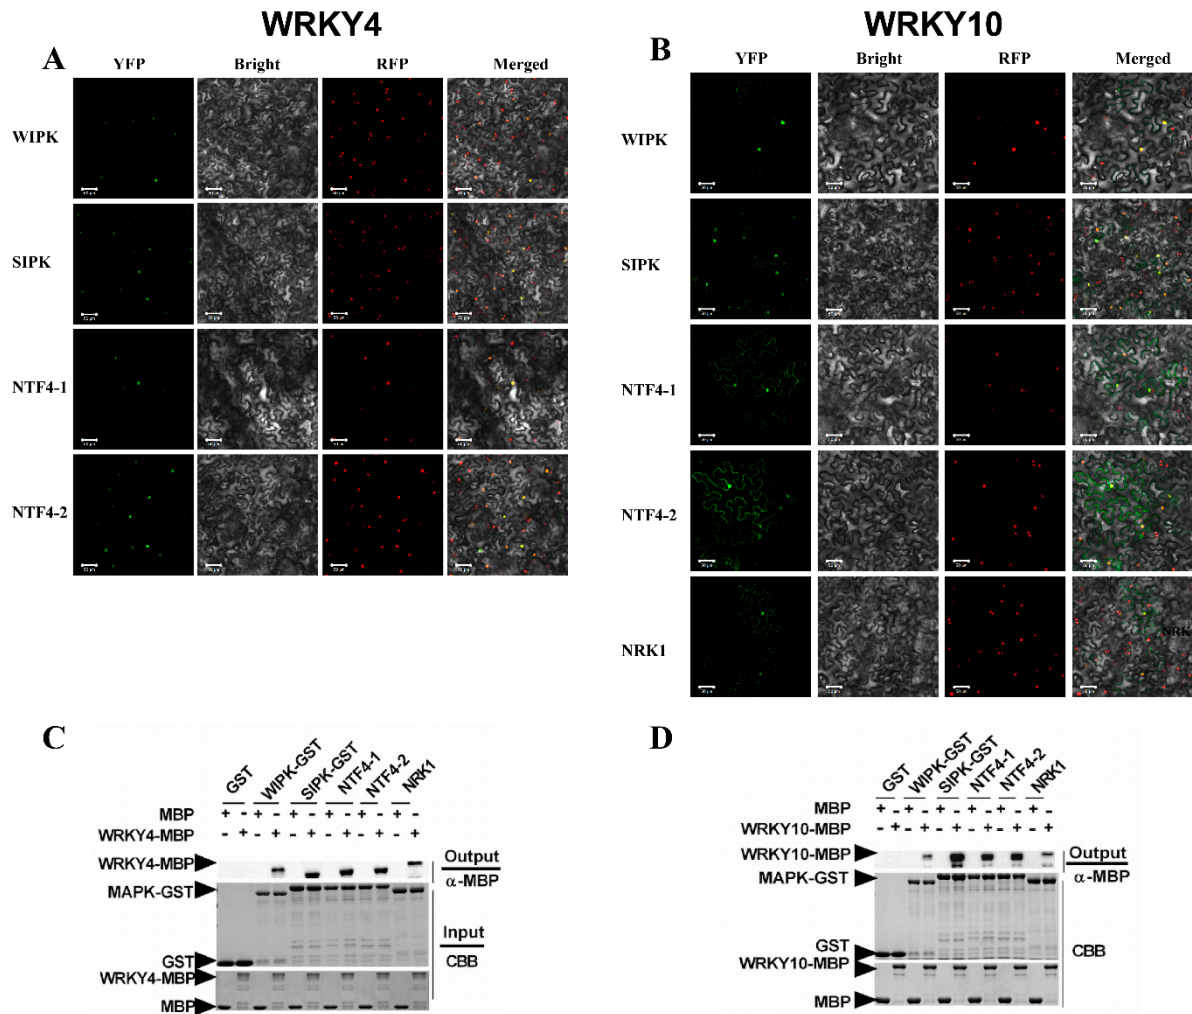

**Figure S1.** The interaction between NtWRKYs and five tobacco MAPKs, wound-induced protein kinase (WIPK), salicylic acid-induced protein kinase (SIPK), NTF4-1, NTF4-2, and NRK1. **(A, B)** *In vivo* interaction between WRKY4, WRKY10 and NtMAPKs as shown by BiFC analysis. NtWRKYs-YFPN and NtMAPKs-YFPC were transiently co-expressed in *Nicotiana benthamiana* line H2B-RFP, of which nucleus were marked with RFP fusion protein. Photos were imaged at 48 h using a Zeiss LSM710 confocal microscope. Columns from left to right represent YFP fluorescence, bright field, RFP fluorescence, and YFP/RFP/bright field overlay. Scale bars 50µm. **(C, D)** *In vitro* interaction between NtWRKYs and NtMAPKs as shown by pull-down assay. Proteins GST, NtMAPKs-GST, MBP, NtWRKYs-MBP were expressed by prokaryotic expression, and purified by Glutathione agarose beads or Amylose resin. GST or NtMAPKs-GST fusion proteins were used to pulldown MBP or NtWRKYs-MBP fusion proteins. Binding proteins were analyzed via SDS-PAGE and western blot assays using anti-MBP antibodies. At the start of samples (Input) were stained by Coomassie blue solution. GST and MBP proteins were used as negative controls.
